# Supplementary material for: Freitalite, C&lt;sub&gt;14&lt;/sub&gt;H&lt;sub&gt;10&lt;/sub&gt;, a new aromatic hydrocarbon mineral from Freital, Saxony, Germany
Source: Copernicus journal article supplement (doi:10.5194/ejm-33-1-2021), 2021-01-20
Supplement: Supplementary file [file ejm-33-1-2021-supplement-title-page.pdf › ejm-33-1-2021-supplement-title-page.pdf]

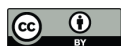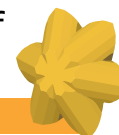

*Supplement of*

**Freitalite, C<sub>14</sub>H<sub>10</sub>, a new aromatic hydrocarbon mineral from Freital,  
Saxony, Germany**

**Thomas Witzke et al.**

*Correspondence to:* Thomas Witzke ([thomas.witzke@panalytical.com](mailto:thomas.witzke@panalytical.com))

- [ejm-33-1-2021-supplement-title-page.pdf](#)
- [CapSpinner\\_Anthracen.CIF](#)
- [CapSpinner\\_Anthracen.XRDML](#)

The copyright of individual parts of the supplement might differ from the CC BY 4.0 License.
